# Supplementary material
Source: HighWire-hosted journal article supplement (http://www.qdcxjkg.com/highwire/filestream/113406/field_highwire_adjunct_files/0/suppl_data_00931.pdf)
Supplement: suppl_data_00931.pdf [file suppl_data_00931.pdf]

## **Pulmonary hypertension in lymphangiomyomatosis: characteristics in 20 patients**

### ELECTRONIC REPOSITORY

Authors: Vincent COTTIN, MD PhD (1), Sergio HARARI, MD (2), Marc HUMBERT, MD PhD (3), Hervé MAL, MD PhD (4), Peter DORFMÜLLER, MD PhD (5), Xavier JAIS, MD (3), Martine REYNAUD-GAUBERT, MD PhD (6), Grégoire PREVOT, MD (7), Romain LAZOR, MD (1,8), Camille TAILLÉ, MD (4), Jacques LACRONIQUE (9), Sabrina ZEGHMAR, MSc (1), Gérald SIMONNEAU, MD (3), Jean-François CORDIER, MD (1), and the Groupe d'Etudes et de Recherche sur les Maladies "Orphelines" Pulmonaires (GERM"O"P)

Table S1. Correlations between haemodynamics and pulmonary function

|                                                   | <i>Mean PAP</i>        | <i>Cardiac index</i>    | <i>PVR</i>              |
|---------------------------------------------------|------------------------|-------------------------|-------------------------|
| FEV <sub>1</sub>                                  | 0.526 ( <b>0.021</b> ) | -0.351 (0.140)          | 0.593 ( <b>0.007</b> )  |
| FVC                                               | 0.309 (0.212)          | -0.485 ( <b>0.042</b> ) | 0.516 ( <b>0.028</b> )  |
| DLco                                              | 0.286 (0.266)          | -3.346 (0.174)          | 0.657 ( <b>0.004</b> )  |
| Kco                                               | 0.530 (0.076)          | -0.673 ( <b>0.016</b> ) | 0.834 (< <b>0.001</b> ) |
| PaO <sub>2</sub> at rest                          | 0.286 (0.301)          | -0.180 (0.301)          | 0.419 (0.094)           |
| SpO <sub>2</sub> (%) at end of<br>6-min walk test | -0.314 (0.219)         | 0.163 (0.533)           | 0.027 (0.918)           |

Data are presented as Pearson's correlation coefficient (p values). PAP: pulmonary arterial pressure; PVR: pulmonary vascular resistance; FVC: forced vital capacity; FEV<sub>1</sub>: forced expiratory volume in 1 s; DLco: single-breath diffusing capacity of the lungs for carbon monoxide; Kco: single breath transfer factor of the lungs for carbon monoxide; PaO<sub>2</sub>: arterial oxygen tension; SpO<sub>2</sub>: peripheral oxygen saturation. P<0.05 values are indicated in bold.
